# Supplementary material for: Academic Promotion of Physicians in Medical Schools: A Special Focus on Primary Health Care in Taiwan
Source: MDPI journal article supplement (doi:10.3390/ijerph18189615), 2021-09-12
Supplement: s1 [file s1]

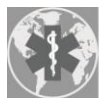

## Supplementary Material

**Table S1.** Websites of academic promotion regulations of 13 medical schools in Taiwan (accessed on 21 March 2021).

| Medical school | Websites                                                                                                                                                                                            |
|----------------|-----------------------------------------------------------------------------------------------------------------------------------------------------------------------------------------------------|
| NTU            | <a href="https://www.mc.ntu.edu.tw/person/Fpage.action?muid=2041&amp;fid=1368">https://www.mc.ntu.edu.tw/person/Fpage.action?muid=2041&amp;fid=1368</a>                                             |
| NYCU           | <a href="https://som.ym.edu.tw/files/11-1153-41.php">https://som.ym.edu.tw/files/11-1153-41.php</a>                                                                                                 |
| NDMC           | <a href="https://www.ndmc.ndmctsg.edu.tw/unit/100003/1114">https://www.ndmc.ndmctsg.edu.tw/unit/100003/1114</a>                                                                                     |
| TMU            | <a href="http://tmu-hr.tmu.edu.tw/zh_tw/pl1">http://tmu-hr.tmu.edu.tw/zh_tw/pl1</a>                                                                                                                 |
| FJU            | <a href="http://www.med.fju.edu.tw/DepIntro.jsp?DI_CODE=5">http://www.med.fju.edu.tw/DepIntro.jsp?DI_CODE=5</a>                                                                                     |
| MMC            | <a href="http://www.personnel.mmc.edu.tw/TechEval.asp">http://www.personnel.mmc.edu.tw/TechEval.asp</a>                                                                                             |
| CGU            | <a href="https://personnel.cgu.edu.tw/p/404-1005-14870.php">https://personnel.cgu.edu.tw/p/404-1005-14870.php</a>                                                                                   |
| CMU            | <a href="https://regulation.cmu.edu.tw/statute_list.php?class=2&amp;dept=28">https://regulation.cmu.edu.tw/statute_list.php?class=2&amp;dept=28</a>                                                 |
| CSMU           | <a href="http://msg.csmu.edu.tw/message/MSG004.aspx?admin=7">http://msg.csmu.edu.tw/message/MSG004.aspx?admin=7</a>                                                                                 |
| NCKU           | <a href="https://www.cc.ncku.edu.tw/rule/detail.php?DEPNO1=74000000">https://www.cc.ncku.edu.tw/rule/detail.php?DEPNO1=74000000</a>                                                                 |
| KMU            | <a href="https://cmed.kmu.edu.tw/index.php/zh-TW/升等-新聘教師專區/升等教師/353-109-2專-兼任「升等」教師【著作送審】專區">https://cmed.kmu.edu.tw/index.php/zh-TW/升等-新聘教師專區/升等教師/353-109-2專-兼任「升等」教師【著作送審】專區</a>                 |
| ISU            | <a href="https://www.isu.edu.tw/2018/show-page_v01.php?dept_mno=633&amp;dept_id=7&amp;page_id=33784">https://www.isu.edu.tw/2018/show-page_v01.php?dept_mno=633&amp;dept_id=7&amp;page_id=33784</a> |
| TCU            | <a href="https://law.tcu.edu.tw/Law?deptCode=310100">https://law.tcu.edu.tw/Law?deptCode=310100</a>                                                                                                 |

NTU: National Taiwan University; NYCU: National Yang Ming Chiao Tung University; NDMC: National Defense Medical Center; TMU: Taipei Medical University; FJU: Fu Jen Catholic University; MMC: Mackay Medical College; CGU: Chang Gung University; CMU: China Medical University; CSMU: Chung Shan Medical University; NCKU: National Cheng Kung University; KMU: Kaohsiung Medical University; ISU: I-Shou University; TCU: Tzu Chi University.
